# Supplementary material for: Epidemiology of Clostridium difficile in infants in Oxfordshire, UK: Risk factors for colonization and carriage, and genetic overlap with regional C. difficile infection strains
Source: PubMed Central journal article supplement (PMC5559064; doi:10.1371/journal.pone.0182307), 2017-08-16

**A**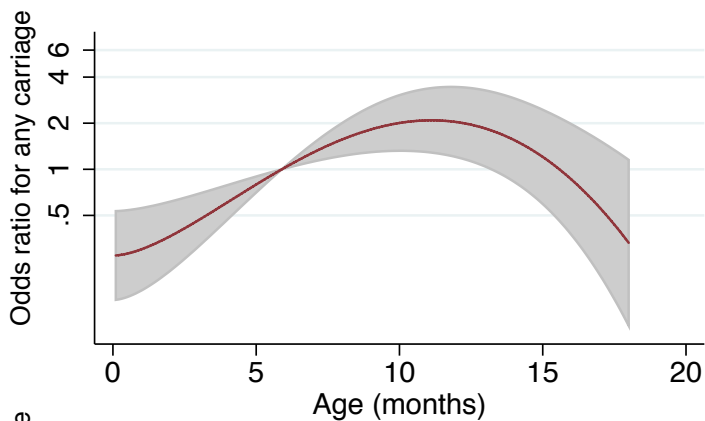**B**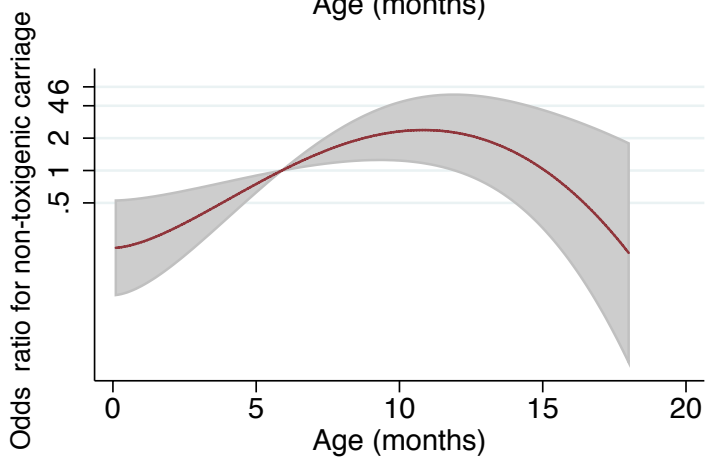**C**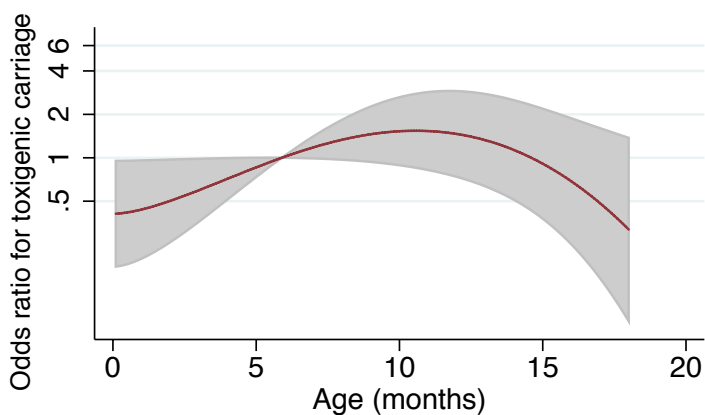

Supplement: pone.0182307.s001.pdf [file pone.0182307.s001.pdf]
